# Supplementary material for: A Preliminary Evaluation of Advanced Oxidation Protein Products (AOPPs) as a Potential Approach to Evaluating Prognosis in Early-Stage Breast Cancer Patients and Its Implication in Tumour Angiogenesis: A 7-Year Single-Centre Study
Source: MDPI journal article supplement (doi:10.3390/cancers16051068), 2024-03-06
Supplement: s1 [file s1]

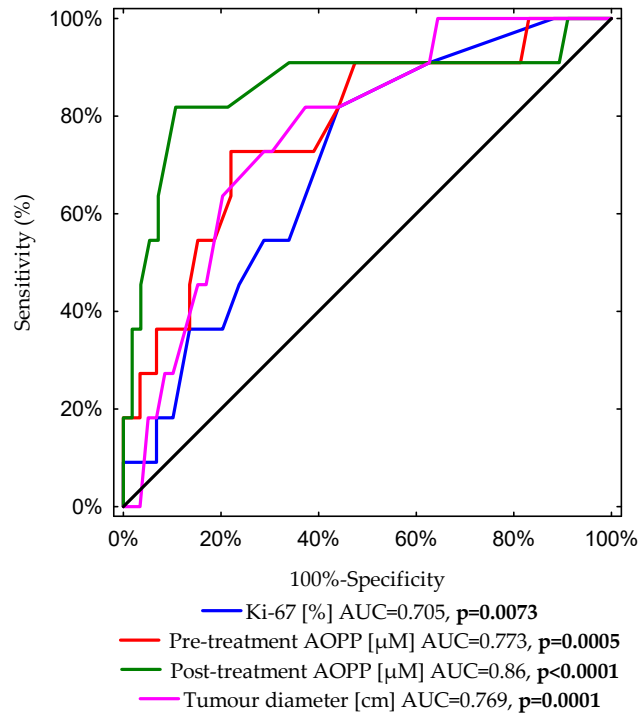

Figure S1 A graph showing four ROC curves for the Ki-67 expression, pre-and post-treatment concentrations of AOPP, and tumour diameter for evaluating the most accurate indicator for disease recurrence with different values of area under the curve (AUC) and  $p$ -values.

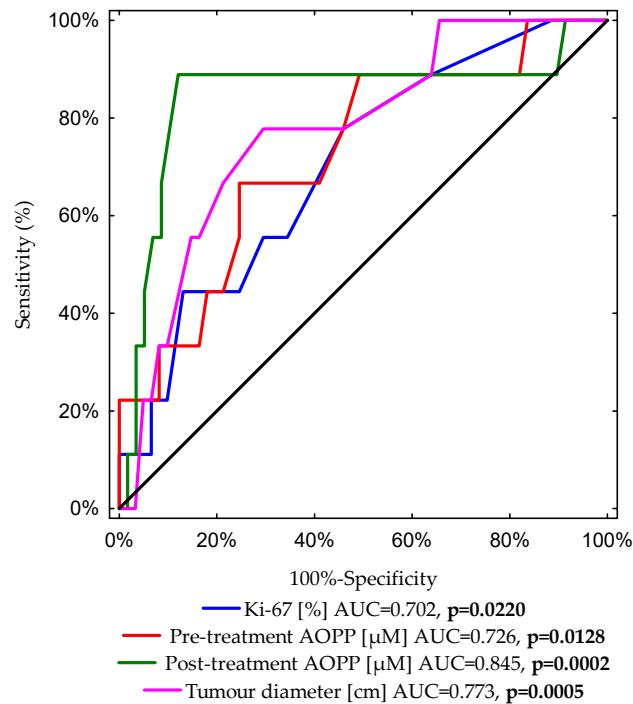

Figure S2 A graph showing four ROC curves for the Ki-67 expression, pre-and post-treatment concentrations of AOPP, and tumour diameter for evaluating the most accurate indicator for predicting cancer-related death with different values of area under the curve (AUC) and  $p$ -values.
